# Supplementary material for: Impact of Lockdown Measures on Health Outcomes of Adults with Type 2 Diabetes Mellitus in Bangladesh
Source: MDPI journal article supplement (doi:10.3390/healthcare11081191), 2023-04-21
Supplement: s1 [file s1]

## Supplementary Tables

Table S1 - Key clinical data sets included in the CRFs and potential targets for patients with T2DM.

| Clinical data                                                 | Nature and targets                                                                                                                                                                                                                                                                                                                                                                                                                                                                                                                                                                                                                                                                                                        |
|---------------------------------------------------------------|---------------------------------------------------------------------------------------------------------------------------------------------------------------------------------------------------------------------------------------------------------------------------------------------------------------------------------------------------------------------------------------------------------------------------------------------------------------------------------------------------------------------------------------------------------------------------------------------------------------------------------------------------------------------------------------------------------------------------|
| Glycemic Control (Extent including any hypoglycemic episodes) | <ul style="list-style-type: none"> <li>HbA1c target of 7.0% (53 mmol/mol) up to 7.9% among people with T2DM will reduce the risk of macrovascular and microvascular disease; a target of 6.5% to 6.03% (48 mmol/mol) is more appropriate at diagnosis [30,54, 66-70].</li> <li>Alternatively, FPG levels <math>\geq 126</math> mg/dL down to 104mg/dl for early diagnosis [67,68].</li> <li>PPG target <math>&lt;10.0</math>mol/l, with clinical studies showing targeting PPG can further improve glycemic control [50,69]</li> </ul>                                                                                                                                                                                    |
| BMI [50,71]                                                   | <ul style="list-style-type: none"> <li>Calculated as weight in Kg/ height in m<sup>2</sup></li> <li>A lower BMI cut-off value was used to define obesity for Asian population: Normal range: 18.50 – 22.99; Overweight: <math>\geq 23.00</math>; Obese: <math>\geq 27.50</math></li> <li>This difference from the American population reflects differences in body fat and musculature, with Asian patients tending to have more body fat, especially abdominal fat. Consequently, for a given BMI, Asian people tend to have higher weight related disease risks at lower BMIs than their Americans counterparts – leading to lower BMI cut-off levels</li> </ul>                                                        |
| Medicines prescribed for glycemic control [50,51, 71, 72]     | <ul style="list-style-type: none"> <li>Oral treatments including Sulphonylureas (Gliclazide, Glimepiride) and Metformin, DPPiv I, Glinides, Voglibose and SGLT2i</li> <li>Injectable: Insulins including regular, intermediate, pre-mixed insulins and long-acting insulin analogues as well as GLP1 RA</li> </ul>                                                                                                                                                                                                                                                                                                                                                                                                        |
| Blood Pressure [50, 71, 73-75]                                | <ul style="list-style-type: none"> <li>BP targets in guidelines vary between <math>&lt; 130/80</math>mmHg and <math>&lt;140/90</math> mmHg; however, a target <math>&lt;140/90</math> mmHg predominates</li> <li>Data on the range of different medicines and classes will be collected including diuretics, beta-blockers, calcium channel blockers as well as medicines acting on the angiotensin system including angiotensin receptor blockers</li> <li>Typically, medicines acting on the angiotensin system are also prescribed to reduce diabetic nephropathy</li> </ul>                                                                                                                                           |
| Lipid profiles [50, 69, 71, 76-78]                            | <p>Targets in Bangladesh with lipid lowering medicines known to decrease subsequent cardiovascular events in patients with T2DM included:</p> <ul style="list-style-type: none"> <li>Total Cholesterol (TC) <math>&lt; 200</math>mg/dl</li> <li>High density lipoprotein (HDL) <math>&gt; 40</math> mg/dl in males and <math>&gt; 50</math> mg/dl in females</li> <li>Low density lipoprotein (LDL) <math>&lt; 100</math>mg/dl</li> <li>Triglyceride (TG) <math>&lt; 150</math> mg/dl</li> <li>Alternatively: TC <math>&lt;4.5</math> mmol/l, LDL-C <math>&lt;1.8</math> mmol/l, HDL-C <math>&lt;1.0</math> for males and <math>&lt;1.3</math> mmol/l for female and triglycerides <math>&lt;1.7</math> mmol/l</li> </ul> |
| Serum creatinine and urinary albumin [73, 74, 79-83]          | <ul style="list-style-type: none"> <li>Urinary albumin: creatinine ratio (ACR): 3-30 mg/mmol OR 30-300mg/g in a spot urine sample (preferably early morning)</li> <li>Albuminuria (present when UACR <math>&gt; 30</math> mg/g) - marker for chronic kidney disease</li> <li>Macroalbuminuria if albumin is present in routine and microscopic examination of urine</li> </ul>                                                                                                                                                                                                                                                                                                                                            |
| Microvascular complications [24, 50, 84, 85]                  | Includes retinopathy, nephropathy and neuropathy with a diagnosis typically based on clinical experience                                                                                                                                                                                                                                                                                                                                                                                                                                                                                                                                                                                                                  |
| Macrovascular complications [24, 75, 84, 86-88]               | <ul style="list-style-type: none"> <li>Includes cardiovascular and cerebrovascular disease as well as peripheral arterial disease and diabetic foot ulcerations</li> <li>Anticoagulants are typically prescribed along with lipid lowering therapies to reduce CV events</li> <li>Diagnosis typically based on clinical experience</li> </ul>                                                                                                                                                                                                                                                                                                                                                                             |

|                                                  |                                                                                                                                                            |
|--------------------------------------------------|------------------------------------------------------------------------------------------------------------------------------------------------------------|
| Hospitalizations [30]                            | <ul style="list-style-type: none"> <li>History of hospitalizations</li> <li>Rationale - recorded in patients' discharge notes from the hospital</li> </ul> |
| Any other co-morbidities/ complications [89, 90] | This could include asthma and chronic obstructive pulmonary disease (COPD) as well as thyroid disorders                                                    |

Table S2 - Treatments prescribed to manage patients' blood sugar levels.

| Diabetes Medicine      | Visit-1     | Visit-2     | Visit-3     | Visit-4     | Visit-5     |
|------------------------|-------------|-------------|-------------|-------------|-------------|
| Metformin              |             |             |             |             |             |
| No                     | 8 (1.2%)    | 5 (0.7%)    | 56 (7.7%)   | 27 (3.9%)   | 92 (12.6%)  |
| Yes                    | 40 (5.8%)   | 43 (6.3%)   | 101 (13.8%) | 305 (44.3%) | 595 (81.5%) |
| NR                     | 640 (93.0%) | 640 (93.0%) | 573 (78.5%) | 356 (51.7%) | 43 (5.9%)   |
| Gliclazide             |             |             |             |             |             |
| No                     | 75 (10.3%)  | 76 (10.4%)  | 131 (17.9%) | 307 (42.1%) | 571 (78.2%) |
| Yes                    | 15 (2.1%)   | 14 (1.90%)  | 26(3.6%)    | 67 (9.2%)   | 116 (15.9%) |
| NR                     | 640 (93.0%) | 640 (87.7%) | 573 (78.5%) | 356 (48.8%) | 43 (5.9%)   |
| Glimepiride            |             |             |             |             |             |
| No                     | 47 (6.8%)   | 48 (7.0%)   | 111 (16.1%) | 314 (45.6%) | 614 (89.2%) |
| Yes                    | 1 (0.1%)    | 0           | 4 (0.6%)    | 18 (2.6%)   | 31 (4.5%)   |
| NR                     | 640 (93.0%) | 640 (7.0%)  | 573 (83.3%) | 356 (51.7%) | 43 (6.3%)   |
| A Glinide              |             |             |             |             |             |
| No                     | 89 (12.2%)  | 90 (12.3%)  | 152 (20.8%) | 355 (48.6%) | 650 (89.0%) |
| Yes                    | 1 (0.10%)   | 0           | 5 (0.70%)   | 19 (2.60%)  | 37 (5.10%)  |
| NR                     | 640 (87.7%) | 640 (87.7%) | 573 (78.5%) | 356 (48.8%) | 43 (5.90%)  |
| DPP4i                  |             |             |             |             |             |
| No                     | 38 (5.5%)   | 32 (4.7%)   | 72 (10.5%)  | 177 (25.7%) | 343 (49.9%) |
| Yes                    | 10 (1.5%)   | 16 (2.3%)   | 43 (6.3%)   | 155 (22.5%) | 302 (43.9%) |
| NR                     | 640 (93.0%) | 640 (93.0%) | 356 (51.7%) | 356 (51.7%) | 43 (6.3%)   |
| Voglibose              |             |             |             |             |             |
| No                     | 90 (12.3%)  | 90 (12.3%)  | 156 21.4%)  | 373 (51.1%) | 680 (93.2%) |
| Yes                    | 0           | 0           | 1(0.10%)    | 1(0.1%)     | 7(1.0%)     |
| NR                     | 640 (87.7%) | 640 (87.7%) | 573 (78.5%) | 356 (51.7%) | 43 (5.9%)   |
| SGLT2i                 |             |             |             |             |             |
| No                     | 80 (11.0%)  | 74 (10.1%)  | 114 (15.6%) | 219 (30.0%) | 385 (52.7%) |
| Yes                    | 10 (1.4%)   | 16 (2.20%)  | 43 (5.90%)  | 155 (21.2%) | 302 (41.4%) |
| NR                     | 640 (87.7%) | 640 (7.0%)  | 573 (78.5%) | 356 (48.8%) | 43 (5.9%)   |
| Regular use of insulin |             |             |             |             |             |
| No                     | 53 (7.30%)  | 53 (7.30%)  | 71 (9.7%)   | 162 (22.2%) | 208 (28.5%) |
| Yes                    | 6 (0.80%)   | 9 (1.2%)    | 26 (3.6%)   | 92 (12.6%)  | 278 (38.1%) |
| NR                     | 671 (91.9%) | 668 (91.5%) | 633 (86.7%) | 476 (65.2%) | 244 (33.4%) |

NB: NR = Not Recorded.

Table S3 - Details of injectable anti-diabetic medicines prescribed including insulins

|                     | Visit-1     | Visit-2     | Visit-3     | Visit-4     | Visit-5     |
|---------------------|-------------|-------------|-------------|-------------|-------------|
| Rapid acting analog |             |             |             |             |             |
| No                  | 59 (8.1%)   | 62 (8.5%)   | 905 (13.0%) | 246 (33.7%) | 472 (64.7%) |
| Yes                 | 1 (0.1%)    | 0           | 1 (0.1%)    | 8 (1.1%)    | 13 (1.8%)   |
| NR                  | 670 (91.8%) | 668 (91.5%) | 634 (86.8%) | 476 (65.2%) | 245 (33.6%) |
| Intermediate        |             |             |             |             |             |
| No                  | 56 (7.7%)   | 57 (7.8%)   | 83 (11.4%)  | 208 (28.5%) | 303 (41.5%) |
| Yes                 | 4 (0.5%)    | 5 (0.7%)    | 13 (1.8%)   | 47 (6.4%)   | 182 (24.9%) |
| NR                  | 670 (91.8%) | 668 (91.5%) | 634 (86.8%) | 475 (65.1%) | 245 (33.6%) |
| Long-acting analogs |             |             |             |             |             |
| No                  | 59 (8.1%)   | 61 (8.4%)   | 87 (11.9%)  | 216 (29.6%) | 412 (56.4%) |
| Yes                 | -           | 1 (0.1%)    | 9 (1.2%)    | 39 (5.3%)   | 73 (10.0%)  |
| NR                  | 671 (91.9%) | 668 (97.1%) | 634 (86.8%) | 475 (65.1%) | 245 (33.6%) |
| Premixed 30/70      |             |             |             |             |             |
| No                  | 49 (6.7%)   | 51 (7.0%)   | 51 (7.0%)   | 164 (22.5%) | 347 (47.5%) |
| Yes                 | 10 (1.4%)   | 11 (1.5%)   | 11 (1.5%)   | 92 (12.6%)  | 138 (18.9%) |
| NR                  | 671 (91.9%) | 668 (91.5%) | 668 (91.5%) | 474 (64.9%) | 245 (33.6%) |
| Premix analog 30/70 |             |             |             |             |             |
| No                  | 59 (8.1%)   | 62 (8.5%)   | 91 (12.5%)  | 228 (31.2%) | 445 (61.0%) |
| Yes                 | -           | -           | 5 (0.7%)    | 27 (3.7%)   | 40 (5.5%)   |
| NR                  | 671 (91.9%) | 668 (91.5%) | 634 (86.8%) | 475 (65.1%) | 245 (33.6%) |
| Premix analog 25/75 |             |             |             |             |             |
| No                  | 17 (2.5%)   | 20 (2.9%)   | 54 (7.8%)   | 211 (30.7%) | 440 (64.0%) |
| Yes                 | -           | -           | -           | 2 (0.3%)    | 3 (0.40%)   |
| NR                  | 671 (97.5%) | 668 (97.1%) | 634 (92.2%) | 475 (69.0%) | 245 (35.6%) |
| Premixed 50/50      |             |             |             |             |             |
| No                  | 59 (8.1%)   | 62 (8.5%)   | 95 (13.0%)  | 252 (34.5%) | 479 (65.6%) |
| Yes                 | -           | -           | -           | 3 (0.40%)   | 6 (0.80%)   |
| NR                  | 671 (91.9%) | 668 (91.5%) | 634 (86.8%) | 475 (65.1%) | 245 (33.6%) |
| GLP1-RA             |             |             |             |             |             |
| No                  | 59 (8.1%)   | 62 (8.5%)   | 95 (13.0%)  | 247 (33.8%) | 464 (63.6%) |
| Yes                 | -           | -           | 1 (0.10%)   | 8 (1.1%)    | 19 (2.6%)   |
| NR                  | 671 (91.9%) | 668 (91.5%) | 634 (86.8%) | 475 (65.1%) | 247 (33.8%) |

NB: NR = Not Recorded

Table S4 - Details of anti-hypertensives, anticoagulants and GTN prescribed.

|                                                 | Visit-1     | Visit-2     | Visit-3     | Visit-4     | Visit-5     |
|-------------------------------------------------|-------------|-------------|-------------|-------------|-------------|
| <b>Angiotensin Receptor Blockers</b>            |             |             |             |             |             |
| Losartan 25/50/100                              |             |             |             |             |             |
| No                                              | 70 (9.6%)   | 72 (9.9%)   | 112 (15.3%) | 251 (34.4%) | 424 (58.1%) |
| Yes                                             | 9 (1.2%)    | 12 (1.6%)   | 21 (2.9%)   | 68 (9.3%)   | 112 (15.3%) |
| NR                                              | 651 (89.2%) | 646 (88.5%) | 597 (81.8%) | 411 (56.3%) | 194 (26.6%) |
| Olmesartan 10/20/40                             |             |             |             |             |             |
| No                                              | 64 (8.8%)   | 67 (9.2%)   | 85 (11.6%)  | 155 (21.2%) | 244 (33.3%) |
| Yes                                             | 14 (1.9%)   | 16 (2.2%)   | 48 (6.6%)   | 164 (22.5%) | 292 (40.0%) |
| NR                                              | 652 (89.3%) | 647 (88.6%) | 597 (81.8%) | 411 (56.3%) | 194 (26.6%) |
| Valsartan 80/160                                |             |             |             |             |             |
| No                                              | 79 (10.8%)  | 83 (11.4%)  | 133 (18.2%) | 319 (43.7%) | 533 (73.0%) |
| Yes                                             | -           | -           | -           | -           | 3 (0.40%)   |
| NR                                              | 651 (89.2%) | 647 (88.6%) | 597 (81.8%) | 411 (56.3%) | 194 (26.6%) |
| Telmisartan 40/80                               |             |             |             |             |             |
| No                                              | 76 (10.4%)  | 81 (11.1%)  | 131 (17.9%) | 306 (41.9%) | 500 (68.5%) |
| Yes                                             | 3 (0.4%)    | 2 (0.3%)    | 2 (0.3%)    | 13 (1.8%)   | 36 (4.9%)   |
| NR                                              | 651 (89.2%) | 647 (88.6%) | 597 (81.8%) | 411 (56.3%) | 194 (26.6%) |
| Azilsartan                                      |             |             |             |             |             |
| No                                              | 79 (10.8%)  | 83 (11.4%)  | 133 (18.2%) | 319 (43.7%) | 536 (73.4%) |
| Yes                                             | -           | -           | -           | -           | -           |
| NR                                              | 651 (89.2%) | 647 (88.6%) | 597 (81.8%) | 411 (56.3%) | 194 (26.6%) |
| Irbesartan                                      |             |             |             |             |             |
| No                                              | 79 (10.8%)  | 83 (11.4%)  | 133 (18.2%) | 319 (43.7%) | 536 (73.4%) |
| Yes                                             | -           | -           | -           | -           | -           |
| NR                                              | 651 (89.2%) | 647 (88.6%) | 597 (81.8%) | 411 (56.3%) | 194 (26.6%) |
| <b>Angiotensin Converting Enzyme Inhibitors</b> |             |             |             |             |             |
| Enalapril 5/10mg                                |             |             |             |             |             |
| No                                              | 79 (10.8%)  | 83 (11.4%)  | 133 (18.2%) | 319 (43.7%) | 536 (73.4%) |
| Yes                                             | -           | -           | -           | -           | -           |
| NR                                              | 651 (89.2%) | 647 (88.6%) | 597 (81.8%) | 411 (56.3%) | 194 (26.6%) |
| Lisinopril                                      |             |             |             |             |             |
| No                                              | 37 (5.4%)   | 41 (6.0%)   | 91 (13.2%)  | 277 (40.3%) | 536 (73.4%) |
| Yes                                             | -           | -           | -           | -           | -           |
| NR                                              | 651 (94.6%) | 647 (94.0%) | 597 (86.8%) | 411 (59.7%) | 194 (28.2%) |
| Captopril                                       |             |             |             |             |             |
| No                                              | 79 (10.8%)  | 83 (11.4%)  | 133 (18.2%) | 319 (43.7%) | 536 (73.4%) |
| Yes                                             | -           | -           | -           | -           | -           |
| NR                                              | 651 (89.2%) | 647 (88.6%) | 597 (81.8%) | 411 (56.3%) | 194 (26.6%) |
| <b>Calcium Channel Blockers</b>                 |             |             |             |             |             |

|                      |             |             |             |             |             |
|----------------------|-------------|-------------|-------------|-------------|-------------|
| Amlodipine 5/10      |             |             |             |             |             |
| No                   | 67 (9.2%)   | 105 (14.4%) | 63 (9.2%)   | 266 (36.4%) | 443 (60.7%) |
| Yes                  | 15 (2.1%)   | 15 (2.1%)   | 28 (4.1%)   | 53 (7.3%)   | 93 (12.7%)  |
| NR                   | 647 (88.6%) | 647 (88.6%) | 597 (86.8%) | 411 (56.3%) | 194 (26.6%) |
| Levamlodipine        |             |             |             |             |             |
| No                   | 79 (10.8%)  | 83 (11.4%)  | 133 (18.2%) | 319 (43.7%) | 536 (73.4%) |
| Yes                  | -           | -           | -           | -           | -           |
| NR                   | 651 (89.2%) | 647 (88.6%) | 597 (81.8%) | 411 (56.3%) | 194 (26.6%) |
| Cilnidipine 5/10     |             |             |             |             |             |
| No                   | 79 (10.8%)  | 81 (11.1%)  | 130 (17.8%) | 304 (41.6%) | 500 (68.5%) |
| Yes                  | -           | 2 (0.30%)   | 3 (0.40%)   | 15 (2.1%)   | 36 (4.9%)   |
| NR                   | 651 (89.2%) | 647 (81.8%) | 597 (81.8%) | 411 (56.3%) | 194 (26.6%) |
| Lercanidipine        |             |             |             |             |             |
| No                   | 79 (10.8%)  | 83 (11.4%)  | 133 (18.1%) | 318 (43.6%) | 534 (73.2%) |
| Yes                  | -           | -           | -           | 11 (0.10%)  | 2 (0.30%)   |
| NR                   | 651 (89.2%) | 647 (88.6%) | 597 (81.8%) | 411 (56.3%) | 194 (26.6%) |
| <b>β-blockers</b>    |             |             |             |             |             |
| Bisoprolol 2.5/5     |             |             |             |             |             |
| No                   | 70 (9.6%)   | 73 (10.0%)  | 109 (14.9%) | 233 (31.9%) | 354 (48.5%) |
| Yes                  | 9 (1.2%)    | 10 (1.4%)   | 24 (3.3%)   | 86 (11.8%)  | 182 (24.9%) |
| NR                   | 651 (89.2%) | 647 (88.6%) | 597 (81.8%) | 411 (56.3%) | 194 (26.6%) |
| Metoprolol 25/50 100 |             |             |             |             |             |
| No                   | 78 (10.7%)  | 82 (11.2%)  | 128 (17.5%) | 304 (41.6%) | 510 (69.9%) |
| Yes                  | 1 (0.10%)   | 1 (0.10%)   | 5 (0.7%)    | 15 (2.10%)  | 26 (3.6%)   |
| NR                   | 651 (89.2%) | 647 (88.6%) | 597 (81.8%) | 411 (56.3%) | 194 (26.6%) |
| Nebivolol            |             |             |             |             |             |
| No                   | 77 (10.5%)  | 82 (11.2%)  | 132 (18.1%) | 317 (43.4%) | 533 (73.0%) |
| Yes                  | 2 (0.3%)    | 1 (0.10%)   | 1 (0.1%)    | 2 (0.3%)    | 3 (0.40%)   |
| NR                   | 651 (89.2%) | 647 (88.6%) | 597 (81.8%) | 411 (56.3%) | 194 (26.6%) |
| <b>α-blockers</b>    |             |             |             |             |             |
| Prazosin             |             |             |             |             |             |
| No                   | 79 (10.8%)  | 83 (11.4%)  | 132 (18.1%) | 316 (43.3%) | 523 (71.6%) |
| Yes                  | -           | -           | 1 (0.1%)    | 3 (0.4%)    | 13(1.8%)    |
| NR                   | 651 (89.2%) | 647 (88.6%) | 597 (81.8%) | 411 (56.3%) | 194 (26.6%) |
| <b>Diuretics</b>     |             |             |             |             |             |
| Thiazide             |             |             |             |             |             |
| No                   | 79 (10.8%)  | 83 (11.4%)  | 133 (18.2%) | 318 (43.6%) | 490 (71.2%) |
| Yes                  | -           | -           | -           | 1 (0.1%)    | 4 (0.6%)    |
| NR                   | 651 (89.2%) | 647 (88.6%) | 597 (81.8%) | 411 (56.3%) | 194 (28.2%) |
| Frusemide            |             |             |             |             |             |

|                       |             |             |              |             |             |
|-----------------------|-------------|-------------|--------------|-------------|-------------|
| No                    | 36 (5.2%)   | 40 (5.8%)   | 90 (13.1%)   | 276 (40.1%) | 531 (72.7%) |
| Yes                   | 1 (0.1%)    | 1 (0.1%)    | 1 (0.1%)     | 1 (0.1%)    | 5 (0.7%)    |
| NR                    | 651 (94.6%) | 647 (94.0%) | 597 (86.8%)  | 411 (59.7%) | 194 (26.6%) |
| <b>Spirolactone</b>   |             |             |              |             |             |
| No                    | 78 (10.7%)  | 82 (11.2%)  | 132 (18.1%)  | 318 (43.6%) | 532 (72.9%) |
| Yes                   | 1 (0.10%)   | 1 (0.10%)   | 1 (0.1%)     | 1 (0.10%)   | 4 (0.5%)    |
| NR                    | 651 (94.6%) | 647 (88.6%) | 597 (81.8%)  | 411 (56.3%) | 194 (26.6%) |
| <b>Anticoagulants</b> |             |             |              |             |             |
| <b>Aspirin 75</b>     |             |             |              |             |             |
| No                    | 78 (10.7%)  | 82 (11.2%)  | 132 (18.1%)  | 318 (43.6%) | 533 (73.0%) |
| Yes                   | 1 (0.10%)   | 1 (0.10%)   | 1 (0.1%)     | 1 (0.10%)   | 3 (0.40%)   |
| NR                    | 651 (94.6%) | 647 (88.6%) | 597 (81.8%)  | 411 (56.3%) | 194 (26.6%) |
| <b>Clopidogrel 75</b> |             |             |              |             |             |
| No                    | 74 (10.1%)  | 79 (10.8%)  | 127 (17.41%) | 311 (42.6%) | 520 (71.2%) |
| Yes                   | 5 (0.70%)   | 4 (0.50%)   | 6 (0.8%)     | 8 (1.10%)   | 16 (2.20%)  |
| NR                    | 651 (89.6%) | 647 (88.6%) | 597(81.8%)   | 411 (56.3%) | 194 (26.6%) |
| <b>Nitroglycerine</b> |             |             |              |             |             |
| No                    | 29 (4.2%)   | 33 (4.8%)   | 80 (11.6%)   | 265 (38.5%) | 475 (69.0%) |
| Yes                   | 7 (1.0%)    | 7 (1.0%)    | 10 (1.5%)    | 12 (1.7%)   | 19 (2.8%)   |
| NR                    | 652 (94.8%) | 648 (94.3%) | 598 (86.9%)  | 411 (59.7%) | 194 (28.2%) |

NB: NR = Not Recorded.

Table S5 - Details of lipid-lowering medicines prescribed.

|                                     | <b>Visit-1</b> | <b>Visit-2</b> | <b>Visit-3</b> | <b>Visit-4</b> | <b>Visit-5</b> |
|-------------------------------------|----------------|----------------|----------------|----------------|----------------|
| <b>Statins (and dose)10/20/40mg</b> |                |                |                |                |                |
| No                                  | 55 (7.50%)     | 55 (7.5%)      | 56 (7.7%)      | 67 (9.2%)      | 76 (10.4%)     |
| Yes                                 | 12 (1.60%)     | 11 (1.5%)      | 43 (5.9%)      | 158 (21.6%)    | 361 (49.5%)    |
| NR                                  | 663 (90.8%)    | 664 (91.0%)    | 631 (86.4%)    | 505 (69.2%)    | 293 (40.1%)    |
| <b>Fibrates (and dose)145/200mg</b> |                |                |                |                |                |
| No                                  | 67 (9.2%)      | 66 (9.0%)      | 97 (13.3%)     | 214 (29.3%)    | 417 (57.1%)    |
| Yes                                 | 1 (0.10%)      | -              | 2 (0.30%)      | 11 (1.5%)      | 20 (2.70%)     |
| NR                                  | 662 (90.7%)    | 664 (91.0%)    | 631 (86.4%)    | 505 (69.2%)    | 293 (40.1%)    |

NB: NR = Not Recorded

Table S6 - Details of micro- and macro-vascular complication rates among the studied patients.

|                                         | Visit-1     | Visit-2     | Visit-3     | Visit-4     | Visit-5     |
|-----------------------------------------|-------------|-------------|-------------|-------------|-------------|
| <b>Microvascular Complications</b>      |             |             |             |             |             |
| <i>Retinopathy</i>                      |             |             |             |             |             |
| No                                      | 43 (6.3%)   | 48 (6.6%)   | 106 (14.5%) | 345 (47.3%) | 611 (83.7%) |
| Yes                                     | -           | -           | 2 (0.3%)    | 2 (0.3%)    | 26 (3.6%)   |
| NR                                      | 687 (94.1%) | 682 (93.4%) | 622 (85.2%) | 383 (52.5%) | 93 (12.7%)  |
| <i>Nephropathy</i>                      |             |             |             |             |             |
| No                                      | 43 (6.3%)   | 47 (6.4%)   | 107 (14.7%) | 328 (44.9%) | 602 (82.5%) |
| Yes                                     | -           | 1 (0.10%)   | 1 (0.10%)   | 19 (2.6%)   | 35 (4.80%)  |
| NR                                      | 687 (94.1%) | 640 (93.4%) | 622 (85.2%) | 383 (52.5%) | 93 (12.7%)  |
| <i>Neuropathy</i>                       |             |             |             |             |             |
| No                                      | 43 (6.3%)   | 47 (6.4%)   | 104 (14.2%) | 325 (44.5%) | 553 (75.8%) |
| Yes                                     | -           | 1 (0.10%)   | 4 (0.50%)   | 22 (3.0%)   | 84 (11.5%)  |
| NR                                      | 687 (94.1%) | 682 (93.4%) | 622 (85.2%) | 383 (52.5%) | 93 (12.7%)  |
| <b>Macrovascular Complications</b>      |             |             |             |             |             |
| <i>Cardiovascular disease</i>           |             |             |             |             |             |
| No                                      | 39 (5.30%)  | 43 (5.9%)   | 101 (13.8%) | 323 (44.2%) | 565 (77.4%) |
| Yes                                     | 4 (0.50%)   | 5 (0.7%)    | 7 (1.0%)    | 24 (3.3%)   | 68 (9.3%)   |
| NR                                      | 687 (94.1%) | 682 (93.4%) | 622 (85.2%) | 383 (52.5%) | 97 (13.3%)  |
| <i>Cerebrovascular disease (Stroke)</i> |             |             |             |             |             |
| No                                      | 43 (5.90%)  | 48 (6.6%)   | 106 (14.5%) | 335 (45.9%) | 616 (84.4%) |
| Yes                                     | -           | -           | 2 (0.30%)   | 13 (1.80%)  | 21 (2.9%)   |
| NR                                      | 687 (94.1%) | 682 (93.4%) | 622 (85.2%) | 382 (52.3%) | 93 (12.7%)  |
| <i>Peripheral arterial disease</i>      |             |             |             |             |             |
| No                                      | 43 (5.90%)  | 48 (6.6%)   | 108 (14.8%) | 347 (47.5%) | 630 (86.3%) |
| Yes                                     | -           | -           | -           | 1 (0.10%)   | 7 (1.0%)    |
| NR                                      | 687 (94.1%) | 682 (93.4%) | 622 (85.2%) | 382 (52.3%) | 93 (12.7%)  |
| <i>Diabetic foot</i>                    |             |             |             |             |             |
| No                                      | 43 (6.3%)   | 48 (7.0%)   | 106 (14.5%) | 342 (46.8%) | 615 (84.2%) |
| Yes                                     | -           | -           | 2 (0.30%)   | 6 (0.80%)   | 22 (3.0%)   |
| NR                                      | 687 (94.1%) | 682 (93.4%) | 622 (85.2%) | 382 (52.3%) | 93 (12.7%)  |

NB: NR = Not Recorded

Table S7. Co-morbidities seen among the studied population.

|                        | Visit-1     | Visit-2     | Visit-3     | Visit-4     | Visit-5     |
|------------------------|-------------|-------------|-------------|-------------|-------------|
| <b>Asthma</b>          |             |             |             |             |             |
| No                     | 43 (6.3%)   | 48 (7.0%)   | 107 (14.7%) | 347 (47.5%) | 625 (85.6%) |
| Yes                    | -           | -           | 1 (0.10%)   | 1 (0.10%)   | 12 (1.6%)   |
| NR                     | 687 (94.1%) | 682 (93.4%) | 622 (85.2%) | 382 (52.3%) | 93 (12.7%)  |
| <b>COPD</b>            |             |             |             |             |             |
| No                     | 43 (6.3%)   | 48 (6.6%)   | 108 (14.8%) | 346 (47.4%) | 632 (86.6%) |
| Yes                    | -           | -           | -           | 2 (0.30%)   | 4 (0.50%)   |
| NR                     | 687 (94.1%) | 682 (93.4%) | 622 (85.2%) | 382 (52.3%) | 93 (12.7%)  |
| <b>Hypothyroidism</b>  |             |             |             |             |             |
| No                     | 42 (5.80%)  | 46 (6.3%)   | 92 (12.6%)  | 288 (39.5)  | 517 (70.8%) |
| Yes                    | 1 (0.1%)    | 2 (0.30%)   | 16 (2.20%)  | 60 (8.20%)  | 120 (16.4%) |
| NR                     | 687 (94.1%) | 682 (93.4%) | 622 (85.2%) | 382 (52.3%) | 93 (12.7%)  |
| <b>Hyperthyroidism</b> |             |             |             |             |             |
| No                     | 43 (6.3%)   | 48 (6.6%)   | 107 (14.7%) | 344 (47.1%) | 625 (85.6%) |
| Yes                    | -           | -           | 1 (0.10%)   | 4 (0.50%)   | 12 (1.6%)   |
| NR                     | 687 (94.1%) | 682 (93.4%) | 622 (85.2%) | 382 (52.3%) | 93 (12.7%)  |

NB: NR = Not Recorded

Table S8 - Other complications and key events.

|                                                                 | Visit-1     | Visit-2     | Visit-3     | Visit-4     | Visit-5     |
|-----------------------------------------------------------------|-------------|-------------|-------------|-------------|-------------|
| <b>Infection (not specified)</b>                                |             |             |             |             |             |
| Yes                                                             | 18 (6.7%)   | 3 (0.4%)    | 2 (0.3%)    | 8 (1.1%)    | 78 (10.7%)  |
| No                                                              | 49 (6.7%)   | 19 (2.6%)   | 77 (10.5%)  | 293 (40.1%) | 626 (85.8)  |
| Not recorded                                                    | 663 (90.8%) | 708 (97.0%) | 651 (89.2%) | 429 (58.8%) | 26 (3.6%)   |
| <b>Waiting for surgery (surgery not specified)</b>              |             |             |             |             |             |
| Yes                                                             | 1 (0.1%)    | 3 (0.4%)    | 4 (0.5%)    | 2 (0.3%)    | 44 (6.0%)   |
| No                                                              | 66 (9.0%)   | 19 (2.6%)   | 75 (10.3%)  | 299 (41.0%) | 660 (90.4%) |
| Not recorded                                                    | 663 (90.8%) | 708 (98.9%) | 651 (89.2%) | 429 (58.8%) | 26 (3.6%)   |
| <b>Required Hospitalization (any medical or surgical cause)</b> |             |             |             |             |             |
| No                                                              | 82 (11.2%)  | 81 (11.1%)  | 82 (11.2%)  | 87 (11.9%)  | 112 (15.3%) |
| Yes                                                             | 6 (0.80%)   | 5 (0.7%)    | 9 (1.20%)   | 17 (2.30%)  | 138 (18.9%) |
| NR                                                              | 642 (87.9%) | 644 (88.2%) | 639 (87.5%) | 626 (85.8%) | 480 (65.8%) |
| <b>Other Illness including other co-morbidities</b>             |             |             |             |             |             |
| Not recorded                                                    | 663 (96.2%) | 666 (96.7%) | 609 (88.4%) | 389 (56.5%) | 2 (0.3%)    |

NB: NR = Not Recorded
